# Supplementary material for: Diarylmethylene-bridged triphenylamine derivatives encapsulated with fluorene: very high Tg host materials for efficient blue and green phosphorescent OLEDs
Source: Royal Society of Chemistry journal article supplement (doi:10.1039/b927576b), 2010-01-01
Supplement: b927576b.pdf [file b927576b.pdf]

## Supplementary Information

# Diarylmethylene-bridged Triphenylamine Derivatives Encapsulated with Fluorene: Very High $T_g$ Host Materials for Efficient Blue and Green Phosphorescent OLEDs

Cong Fan,<sup>a</sup> Yonghua Chen,<sup>b</sup> Zuoquan Jiang,<sup>a</sup> Chuluo Yang,<sup>\*a</sup> Cheng Zhong,<sup>a</sup> Jingui Qin<sup>a</sup> and Dongge Ma<sup>\*b</sup>

*a* Department of Chemistry, Hubei Key Lab on Organic and Polymeric Optoelectronic Materials, Wuhan University, Wuhan 430072, P. R. China

*b* State Key Laboratory of Polymer Physics and Chemistry, Changchun Institute of Applied Chemistry, Chinese Academy of Sciences, Changchun 130022, P. R. China

E-mail: clyang@whu.edu.cn

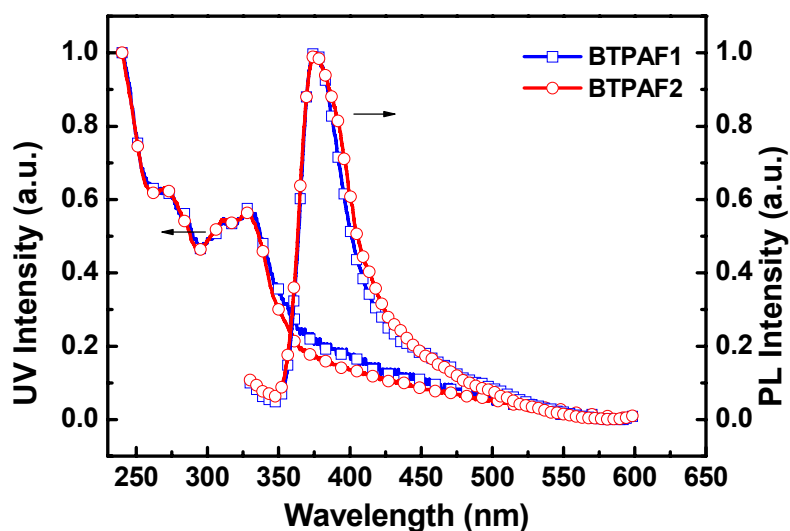

**Figure S1.** UV-vis absorption and PL spectra of BTPAFs in film

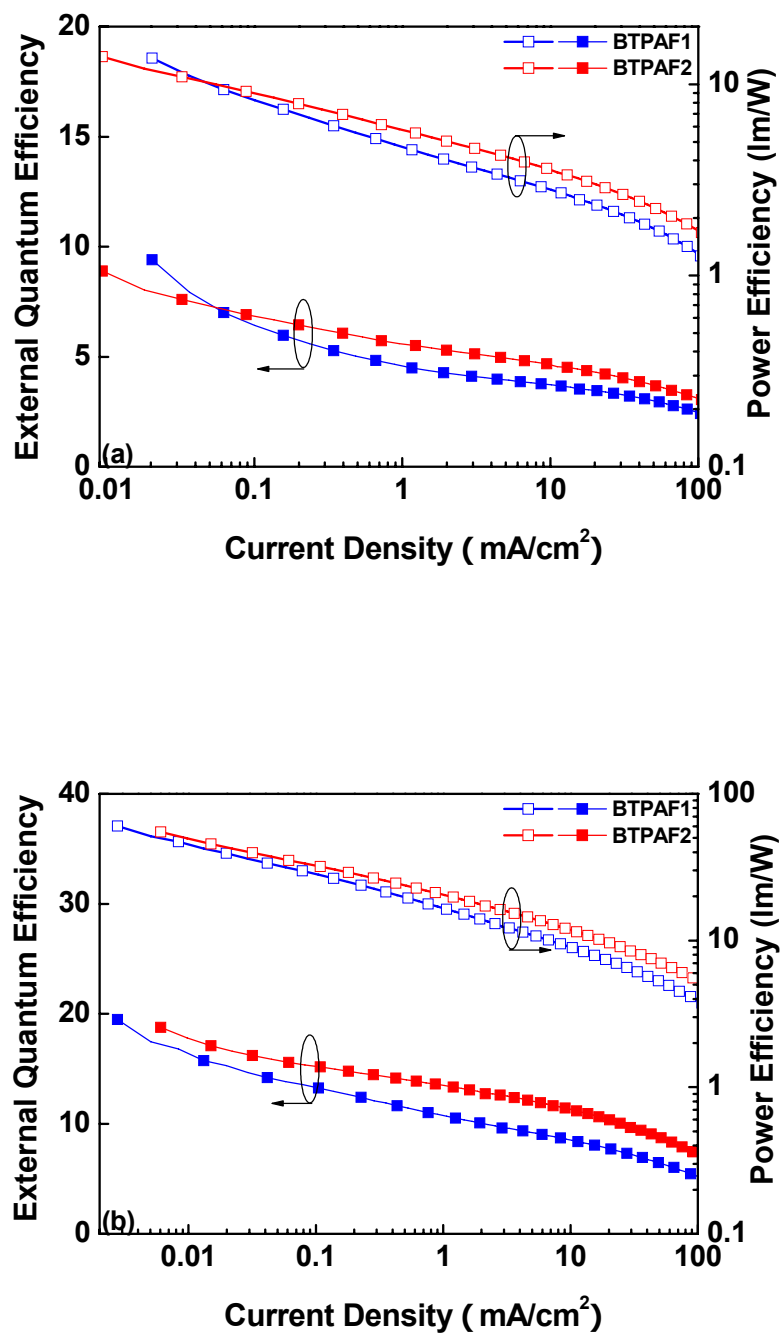

**Figure S2.** Power efficiency and external quantum efficiency (EQE) versus current density for (a) Device A-B; (b) Device C-D.
